# Supplementary material for: The synthesis of a novel binaphthyl-based cyclic peptoid with anti-bacterial activityElectronic supplementary information (ESI) available: ESMS data. See http://www.rsc.org/suppdata/nj/b2/b205894b/
Source: Royal Society of Chemistry journal article supplement (doi:10.1039/b205894b), 2002-10-08

**The synthesis of a novel binaphthyl-based cyclic peptoid with anti-bacterial activity**

John B. Bremner, Jonathan Coates, Daniel R. Coghlan, Dorothy M. David, Paul A. Keller, and Stephen G. Pyne

***Supplementary Material***

***ESMS of the Protected Cyclic Peptoid 12 (m/z 795, M + 1)***

***High Resolution ES+ MS of Cyclic Peptoid 1 [m/z = 695.3427 (found), C40H47N4O7 requires m/z 695.3445]***


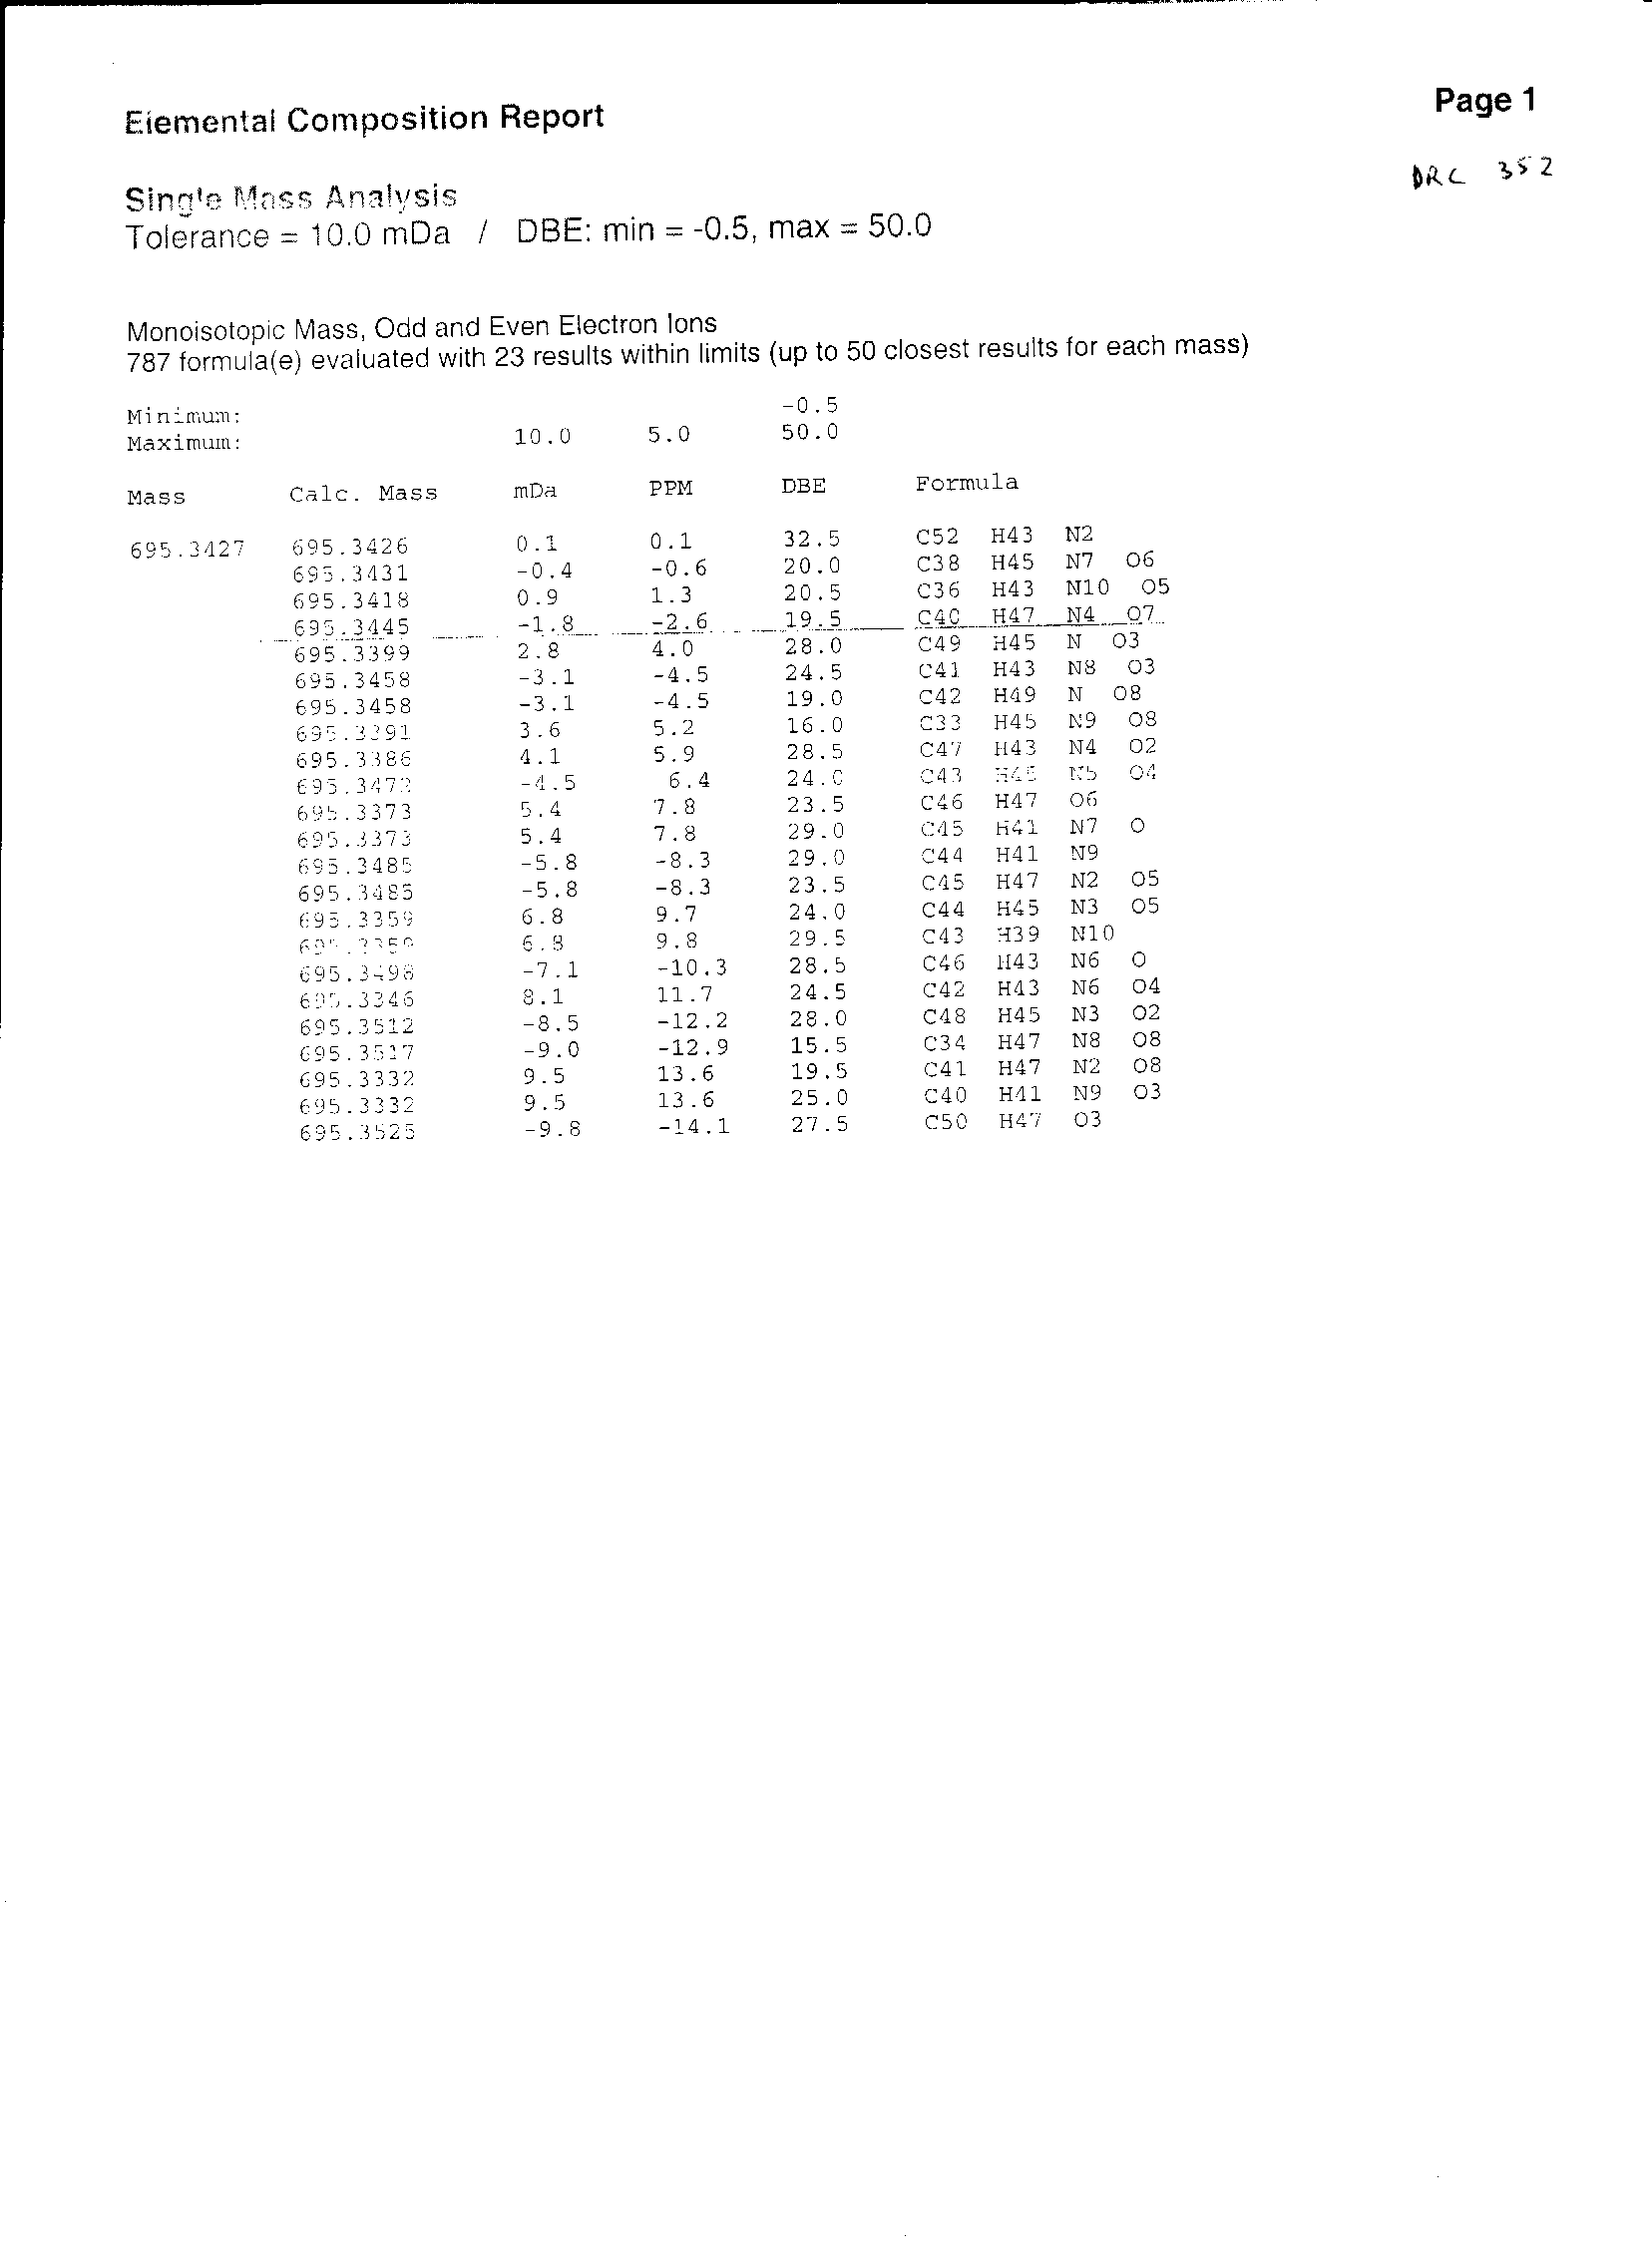

Supplement: b205894b.doc [file b205894b.doc]
